# Supplementary material for: An efficient method to identify, date, and describe admixture events using haplotype information
Source: HighWire-hosted journal article supplement (doi:10.1101/gr.275994.121), 2022-07-06

**BantuKenya vs BantuKenya**

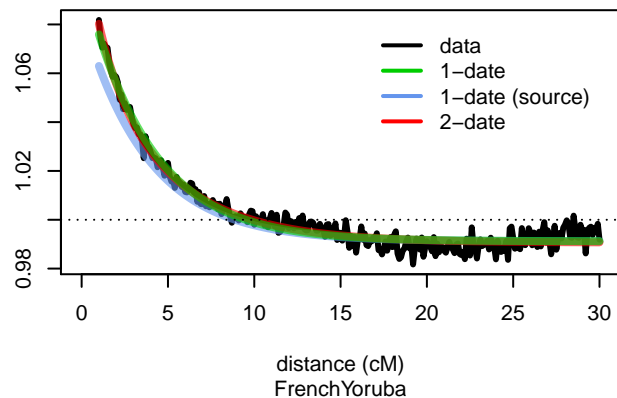

**BantuKenya vs BantuSouthAfrica**

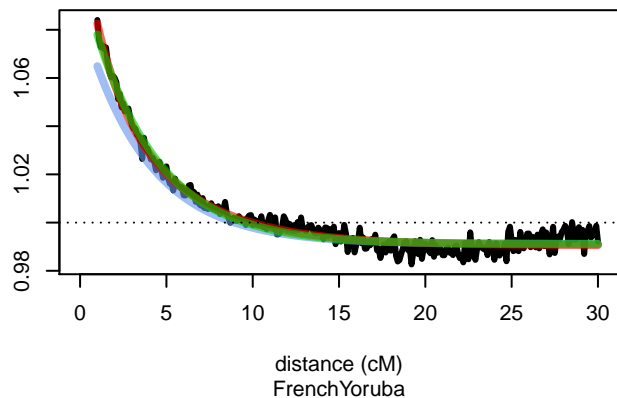

**BantuKenya vs Druze**

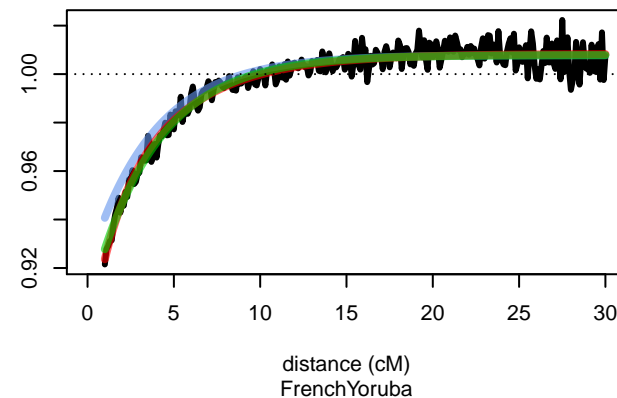

**BantuKenya vs English**

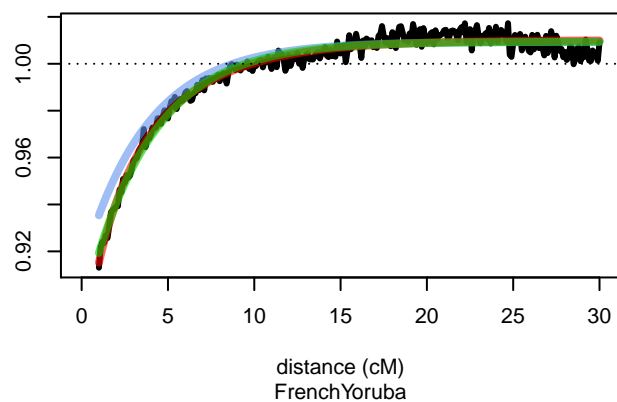

**BantuKenya vs Ireland**

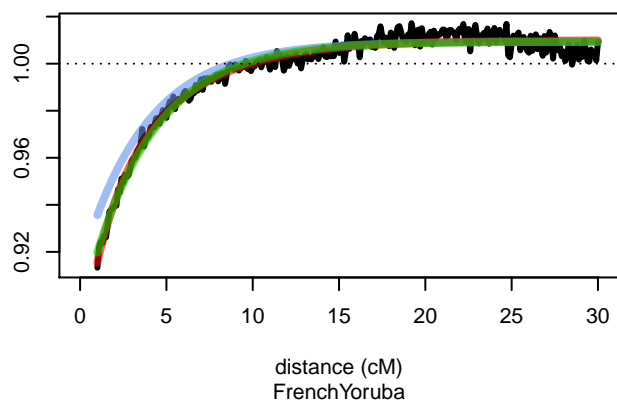

**BantuKenya vs Mandenka**

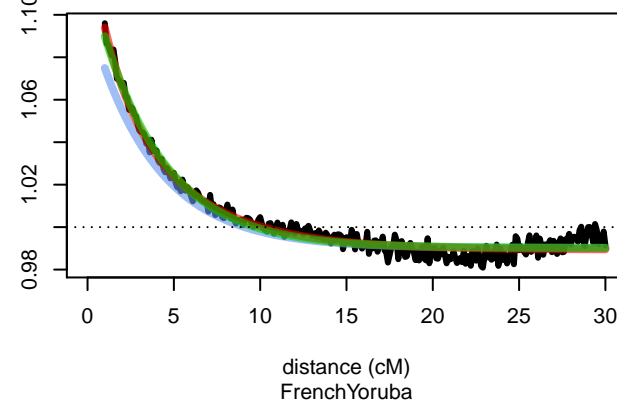

**BantuKenya vs Sardinian**

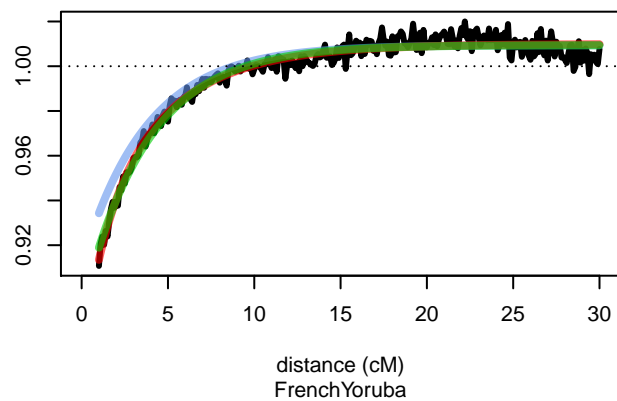

**BantuSouthAfrica vs BantuKenya**

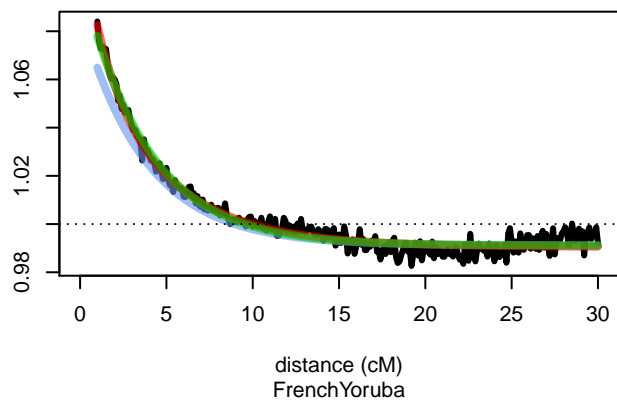

**BantuSouthAfrica vs BantuSouthAfrica**

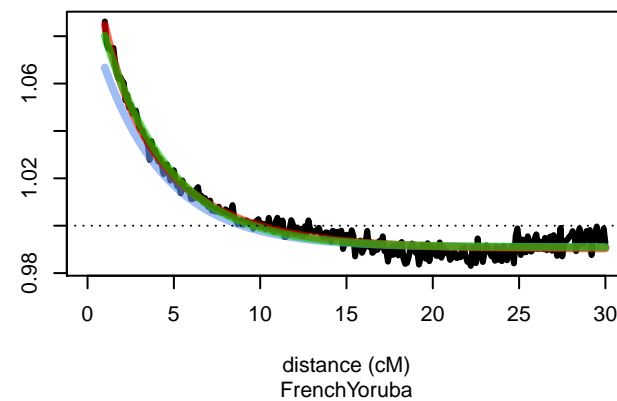

**BantuSouthAfrica vs Druze**

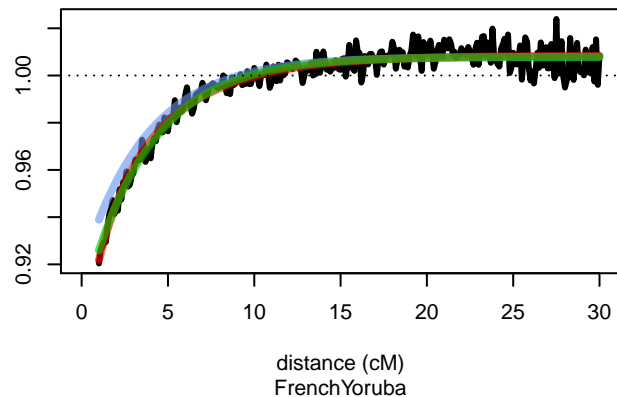

**BantuSouthAfrica vs English**

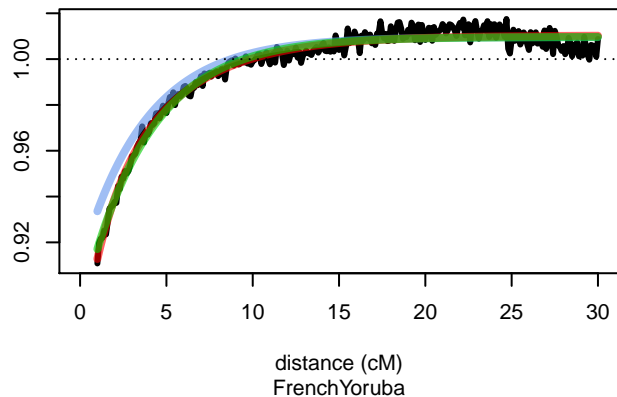

**BantuSouthAfrica vs Ireland**

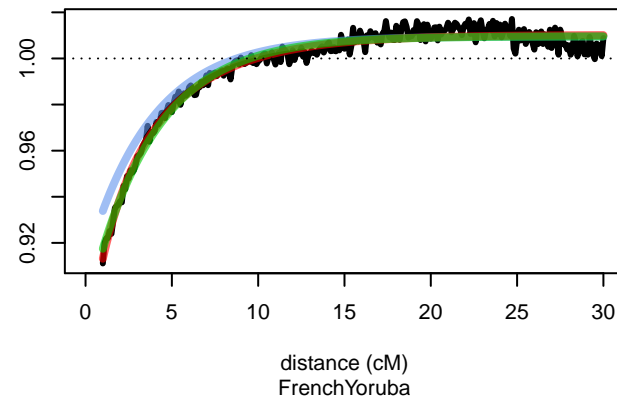

**BantuSouthAfrica vs Mandenka**

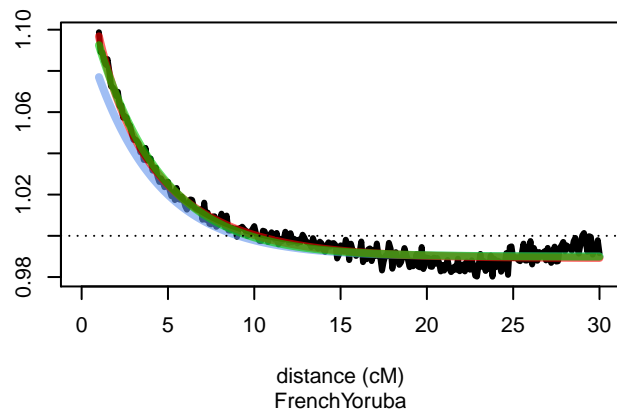

**BantuSouthAfrica vs Sardinian**

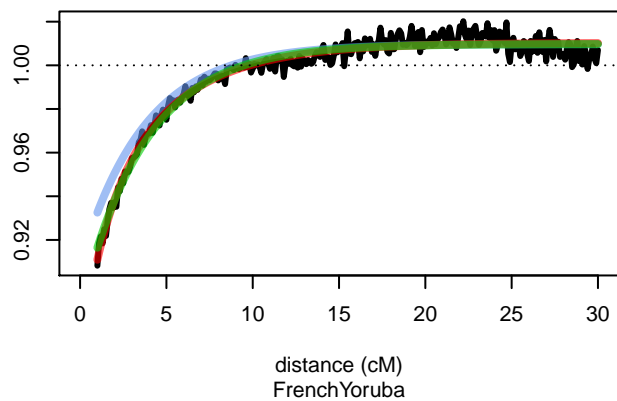

**Druze vs BantuKenya**

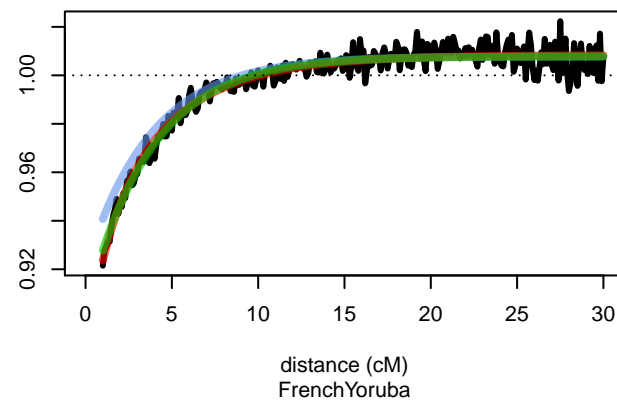

**Druze vs BantuSouthAfrica**

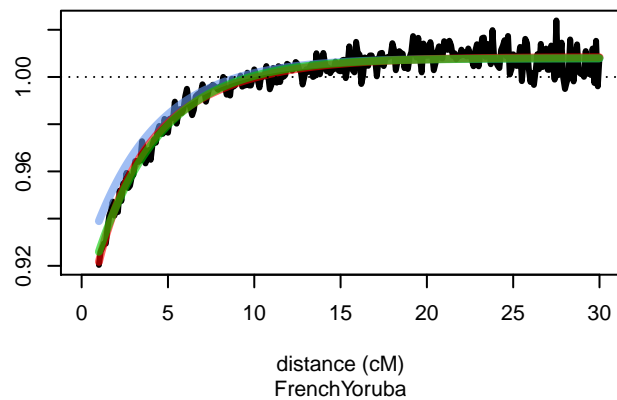

**Druze vs Druze**

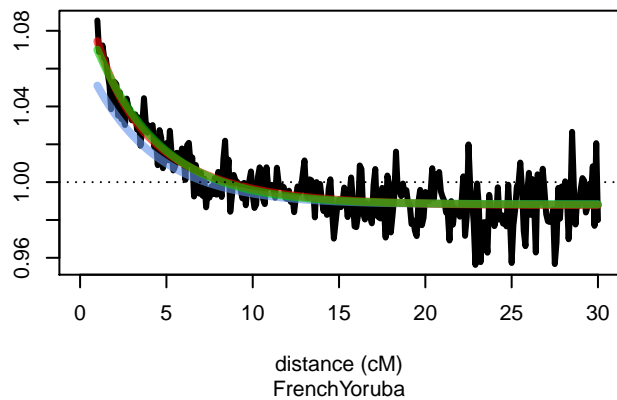

**Druze vs English**

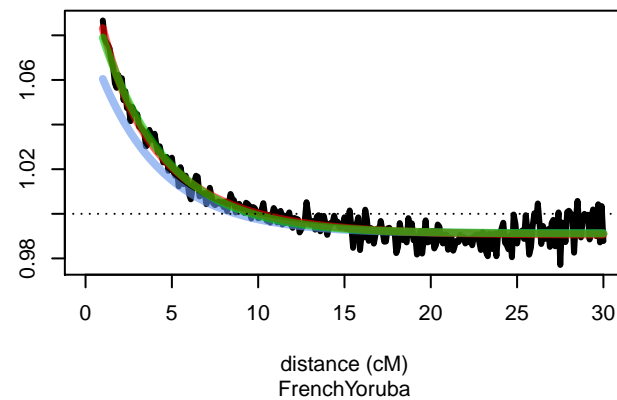

**Druze vs Ireland**

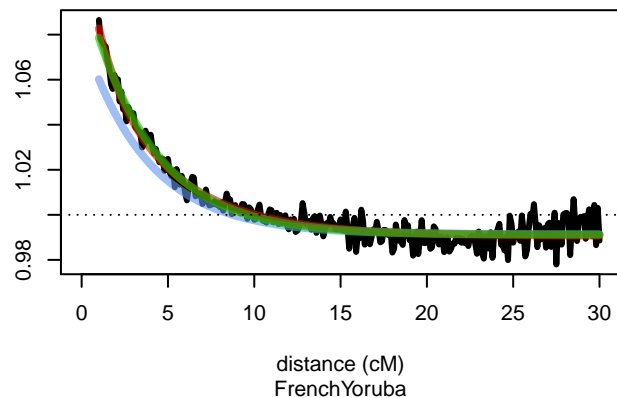

**Druze vs Mandenka**

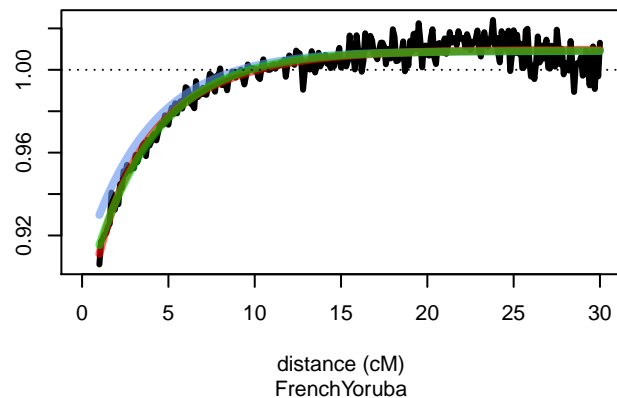

**Druze vs Sardinian**

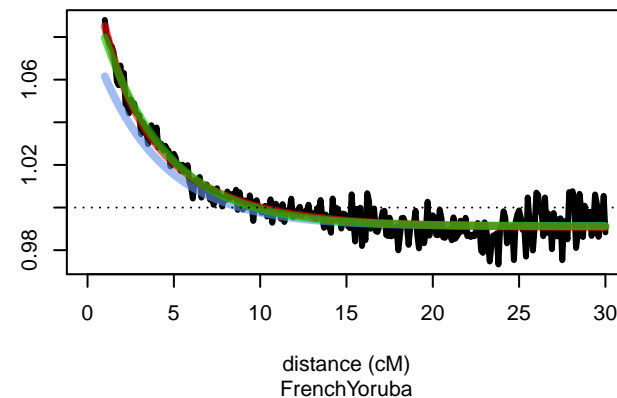

**English vs BantuKenya**



**English vs BantuSouthAfrica**

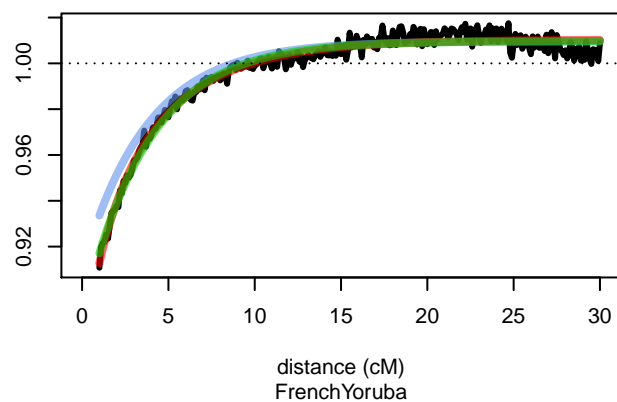

**English vs Druze**

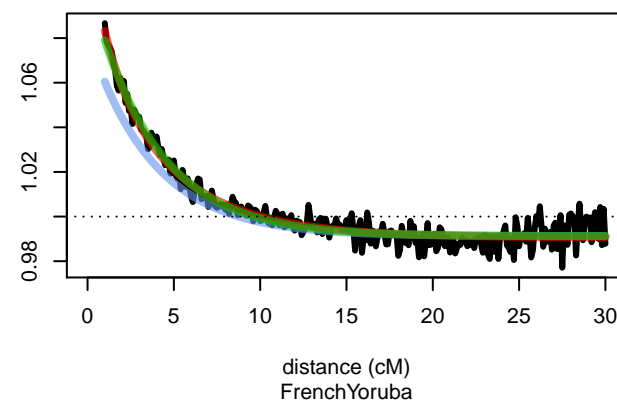

**English vs English**

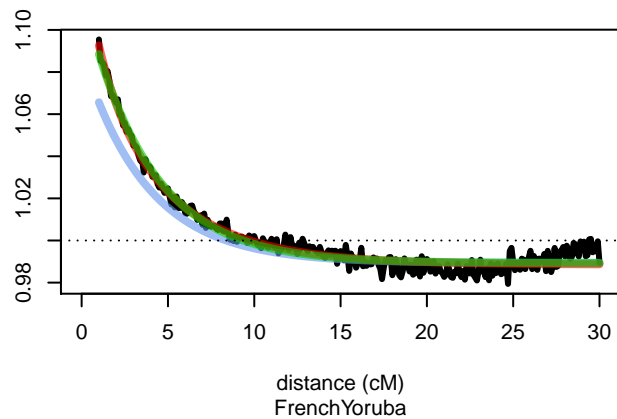

**English vs Ireland**

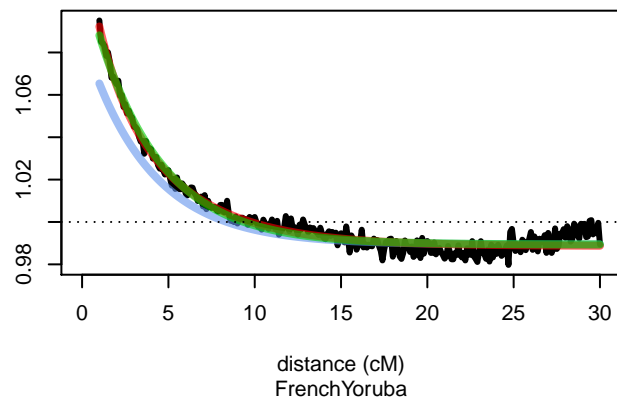

**English vs Mandenka**

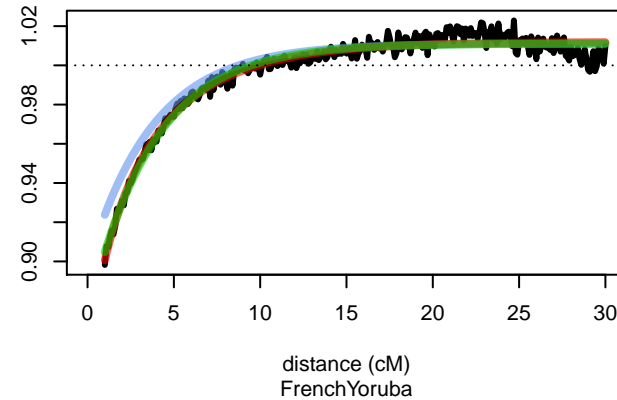

English vs Sardinian

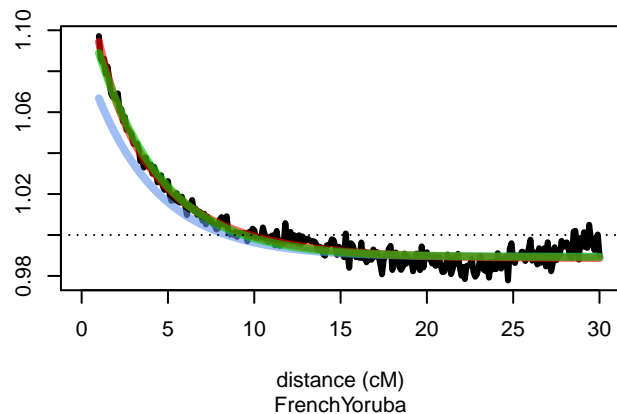

Ireland vs BantuKenya

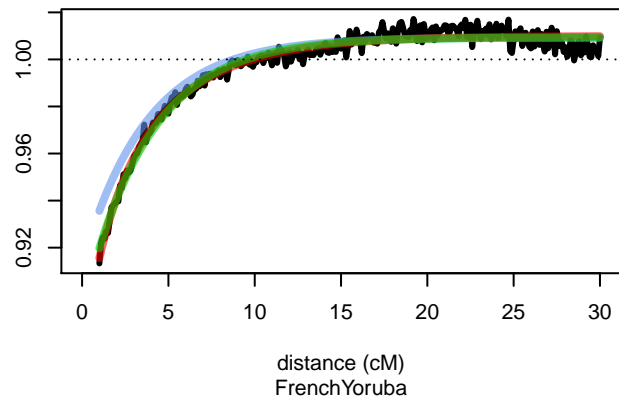

Ireland vs BantuSouthAfrica

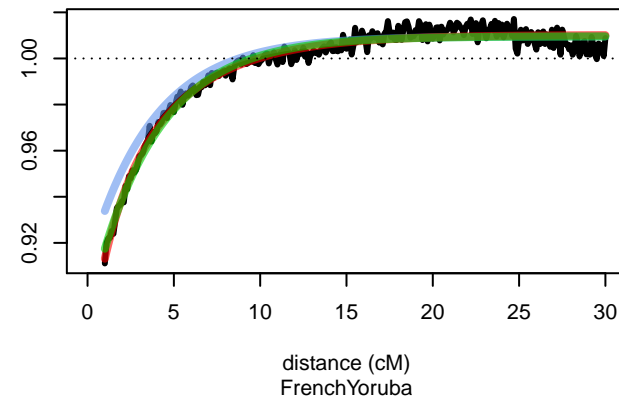

Ireland vs Druze

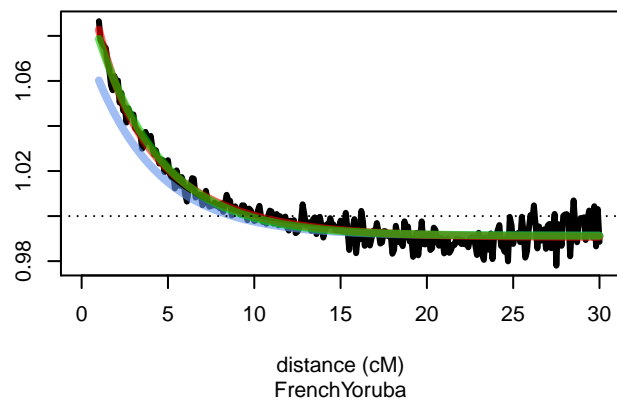

Ireland vs English

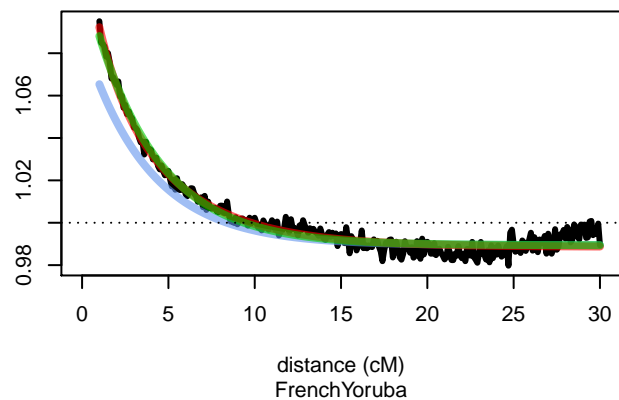

Ireland vs Ireland

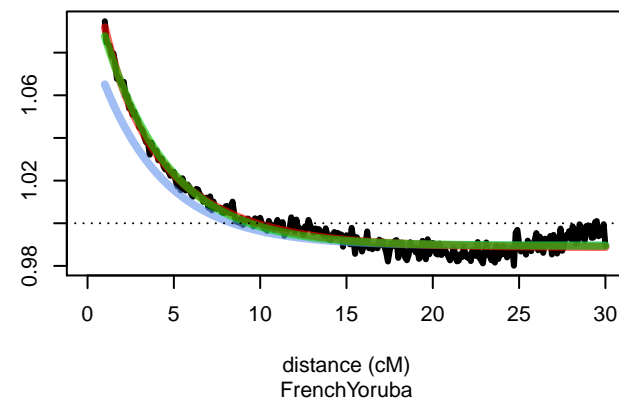

Ireland vs Mandenka

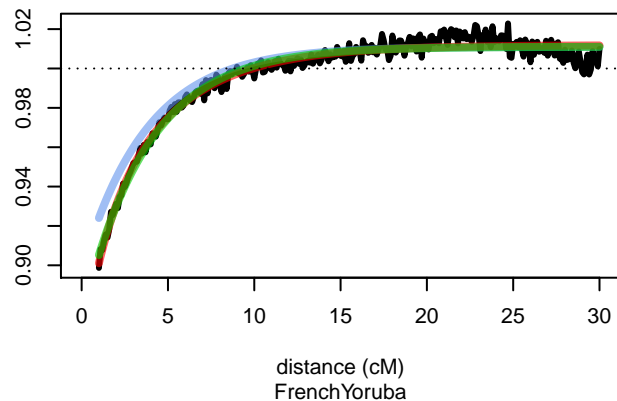

Ireland vs Sardinian

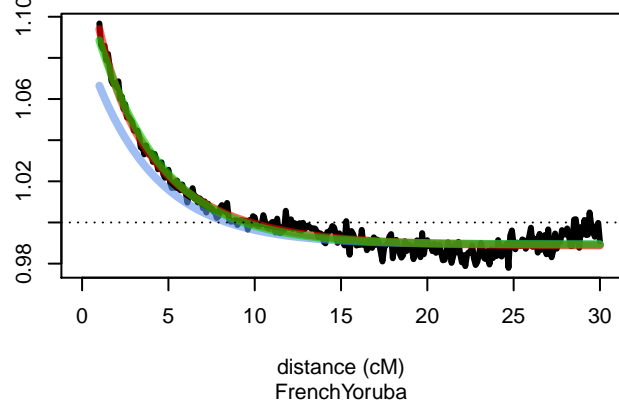

Mandenka vs BantuKenya

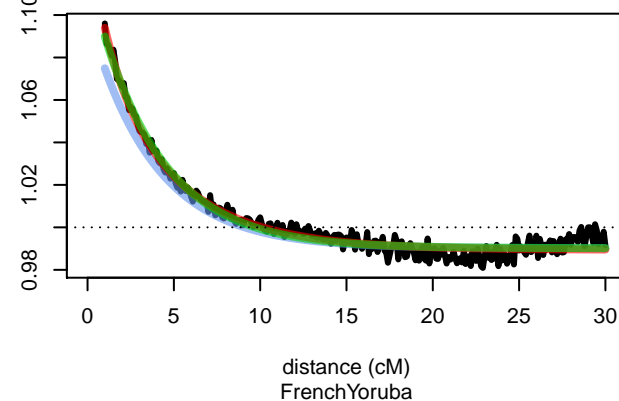

**Mandenka vs BantuSouthAfrica**

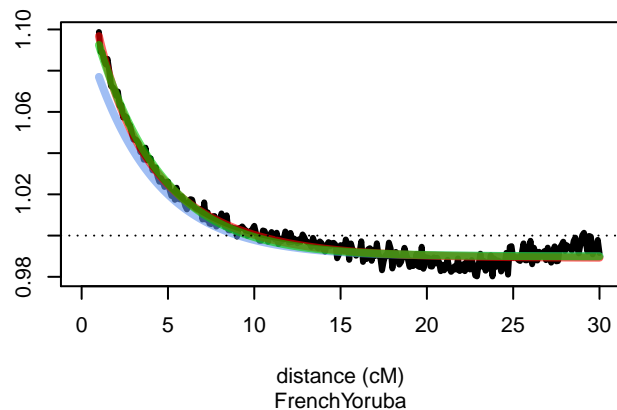

**Mandenka vs Druze**

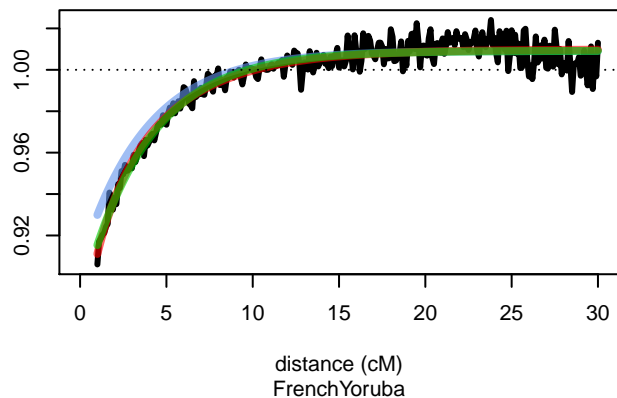

**Mandenka vs English**

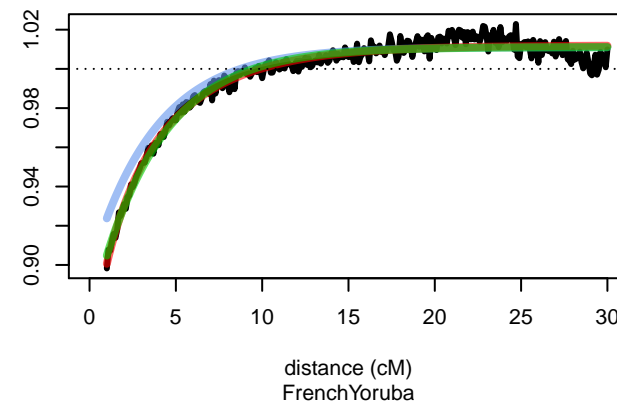

**Mandenka vs Ireland**

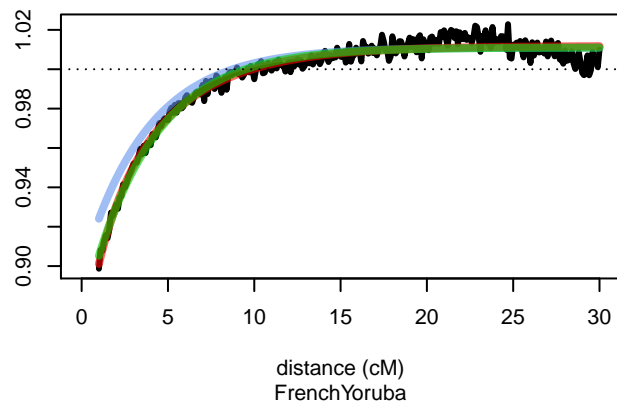

**Mandenka vs Mandenka**

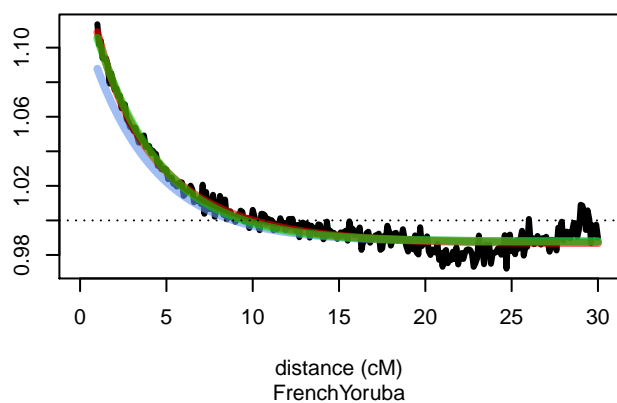

**Mandenka vs Sardinian**

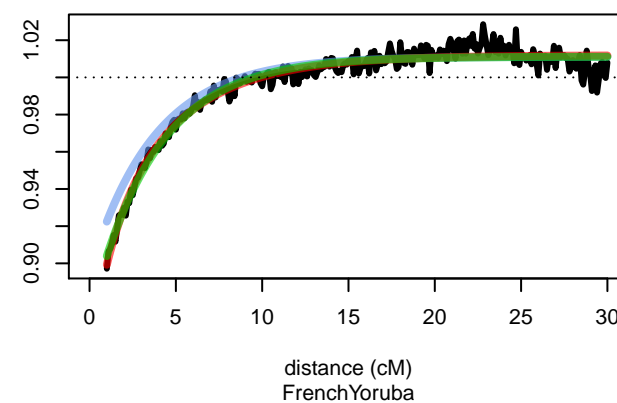

**Sardinian vs BantuKenya**



**Sardinian vs BantuSouthAfrica**

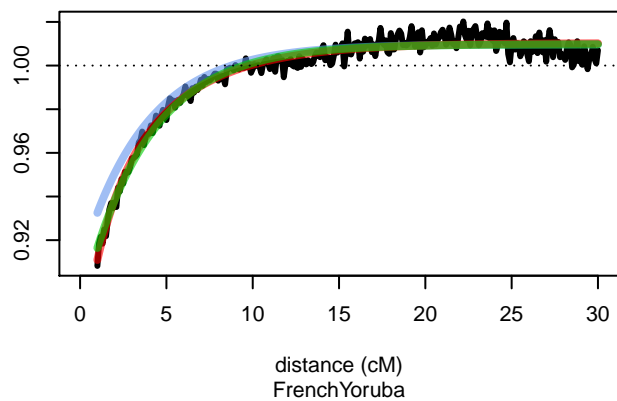

**Sardinian vs Druze**

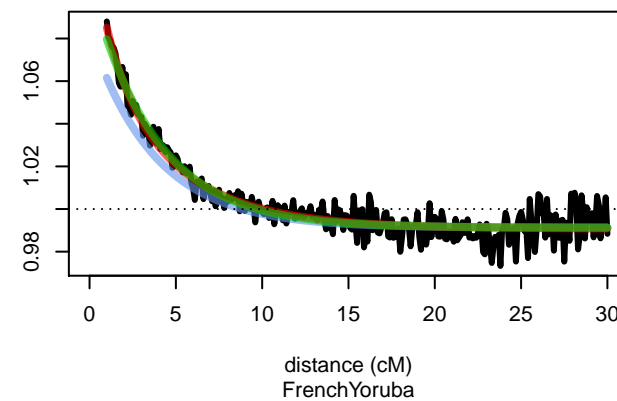

**Sardinian vs English**

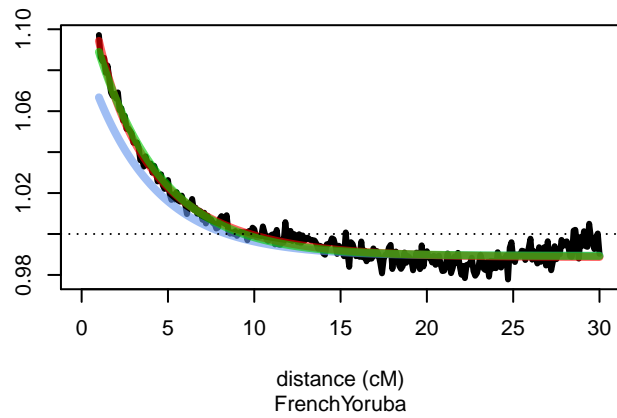

**Sardinian vs Ireland**

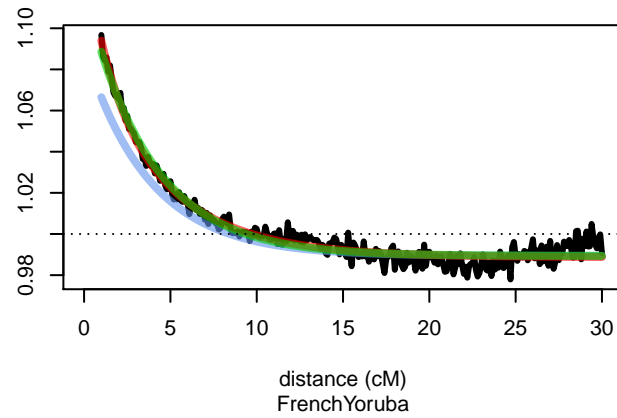

**Sardinian vs Mandenka**

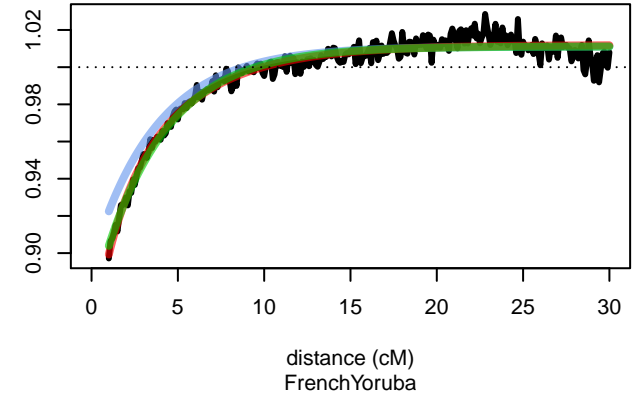

**Sardinian vs Sardinian**

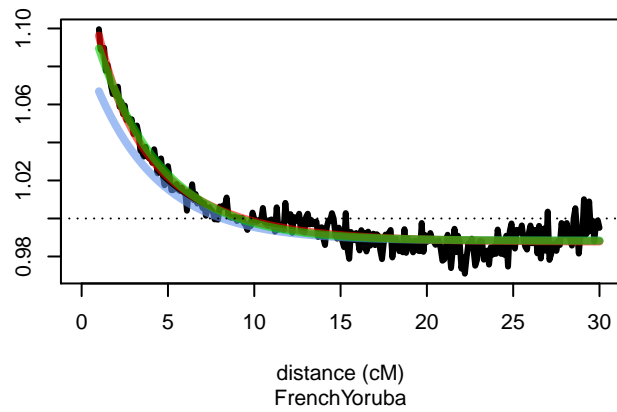

Supplement: Supplemental_Globetrotter.tar.gz [file AllFrenchYoruba30gen50prop.main.pdf › tutorial/AllFrenchYoruba30gen50prop.main.pdf]
